# Supplementary material
Source: Springer Nature journal article supplement (https://www.springermedizin.de/resource/supplementary/12955_2008_457_MOESM4_ESM.pdf/9560498)

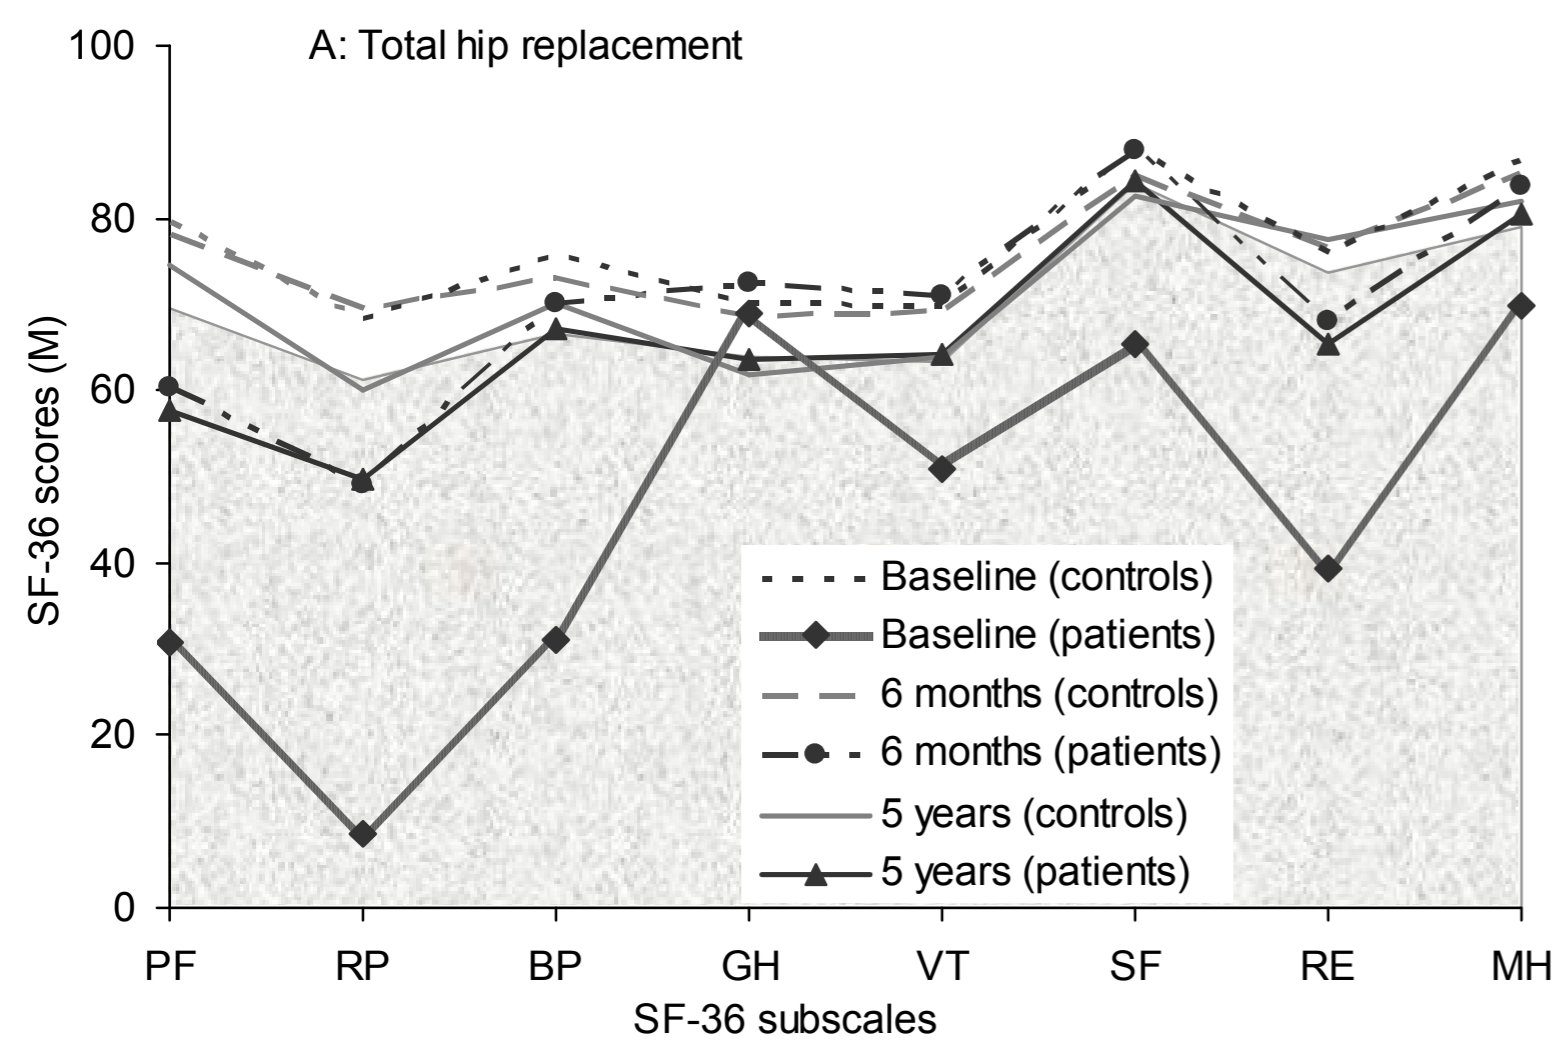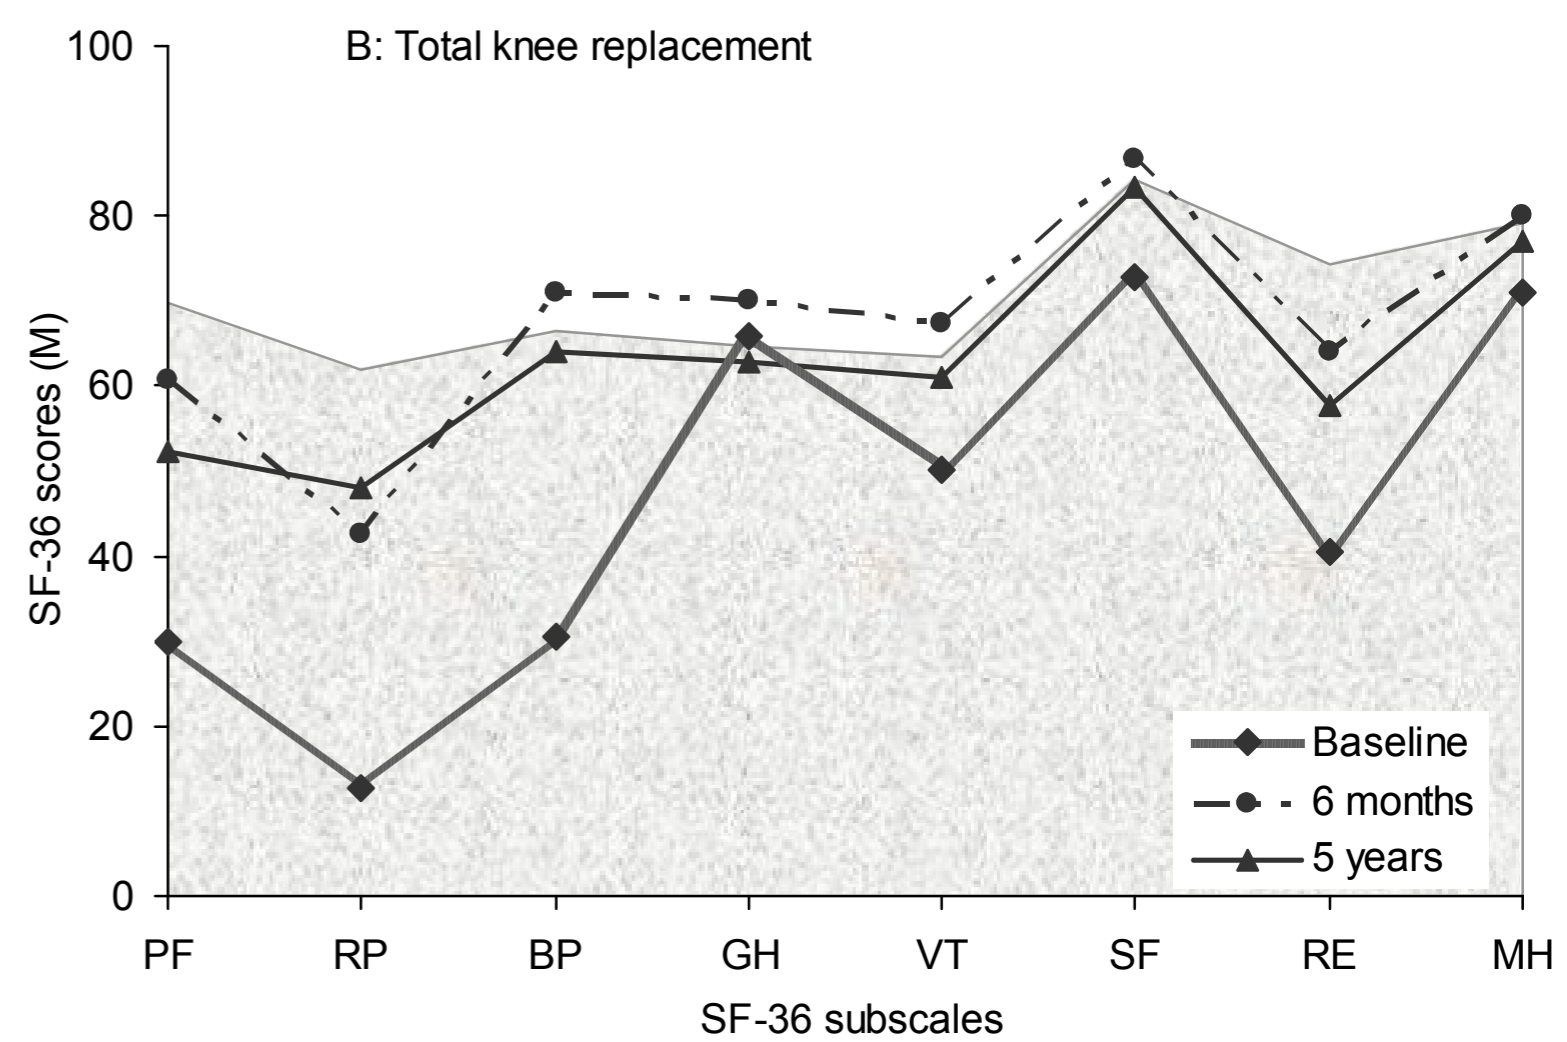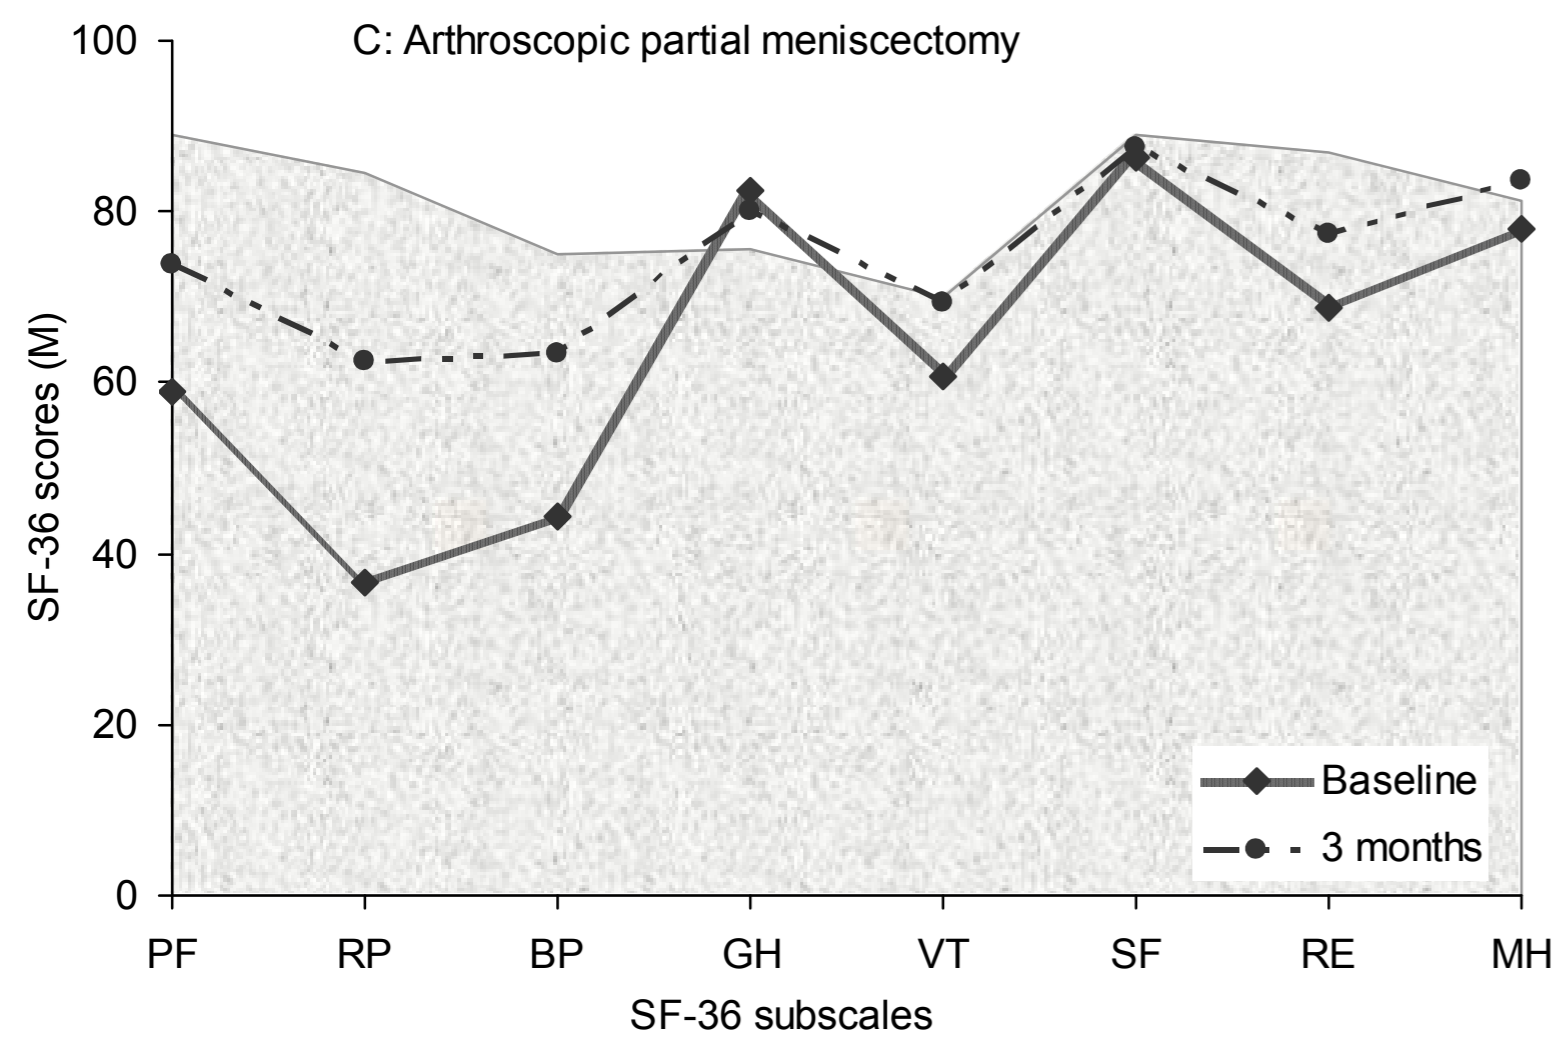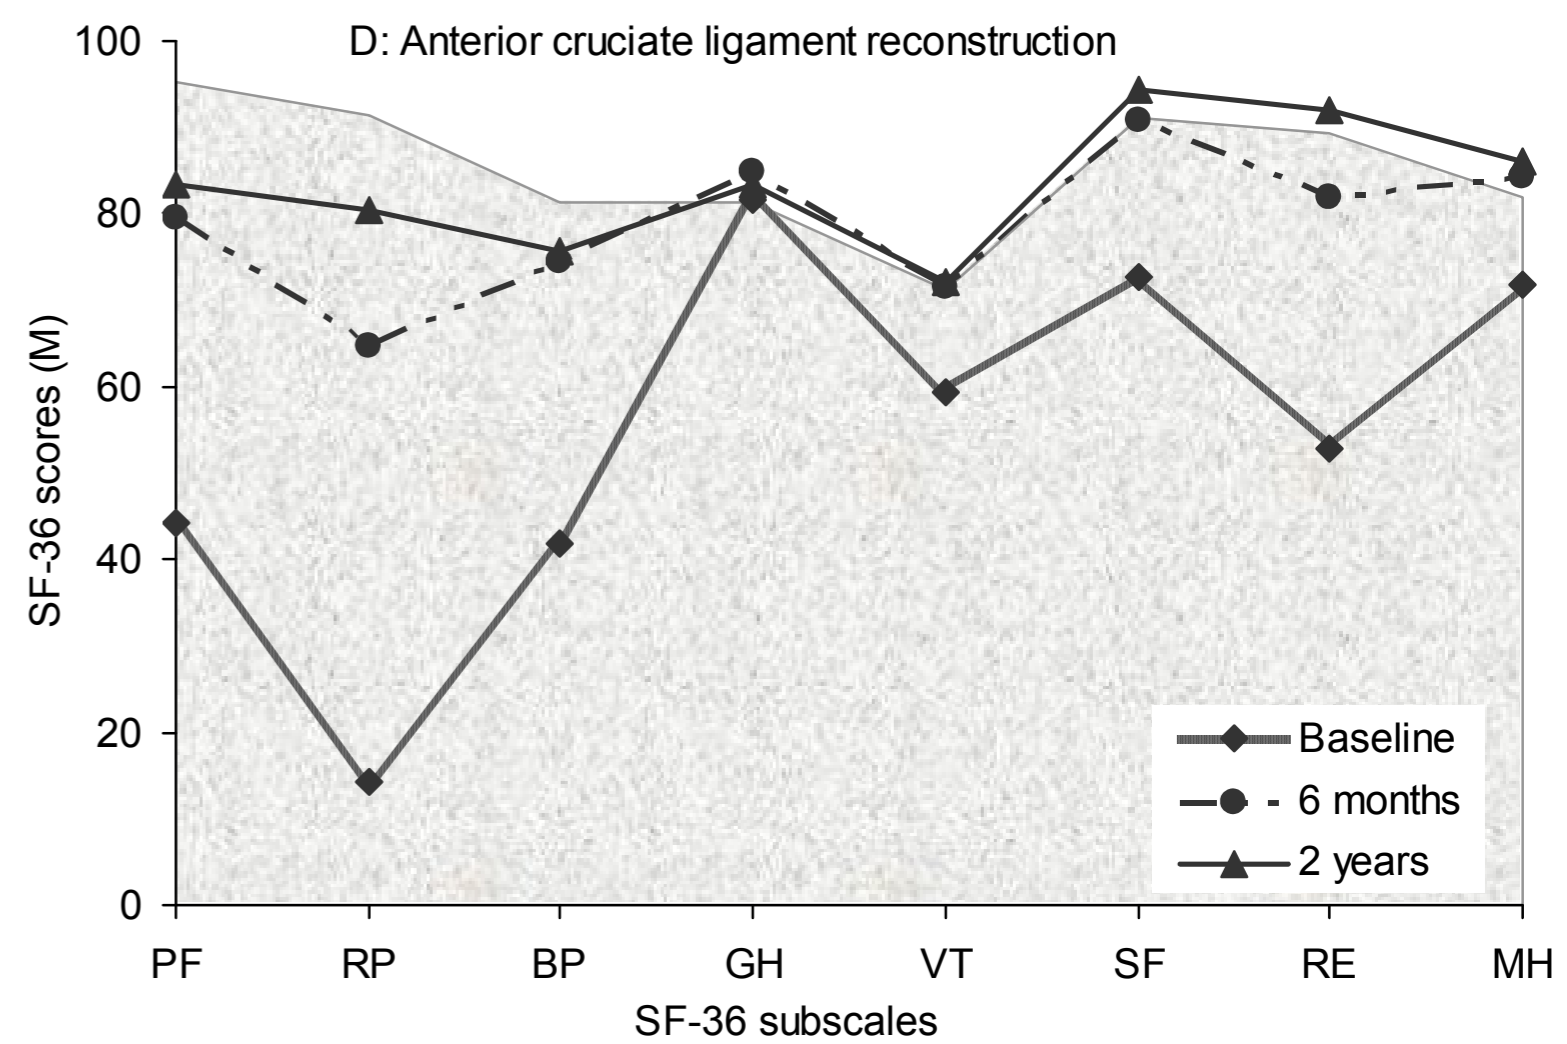

Scores below population norms

Supplement: MOESM4 [file 9560498]
